# Supplementary material for: A green fullerene derivative as a fluoride ion sensor
Source: Royal Society of Chemistry journal article supplement (doi:10.1039/c4qo00111g), 2014-01-01
Supplement: c4qo00111g1.pdf [file c4qo00111g1.pdf]

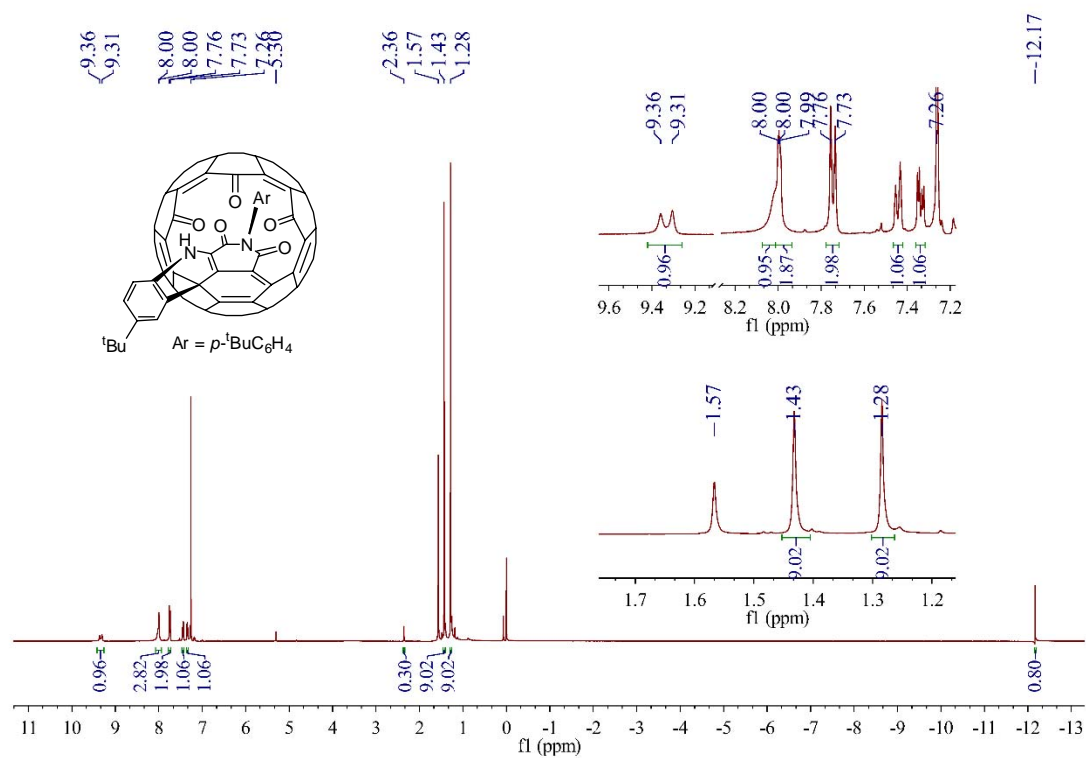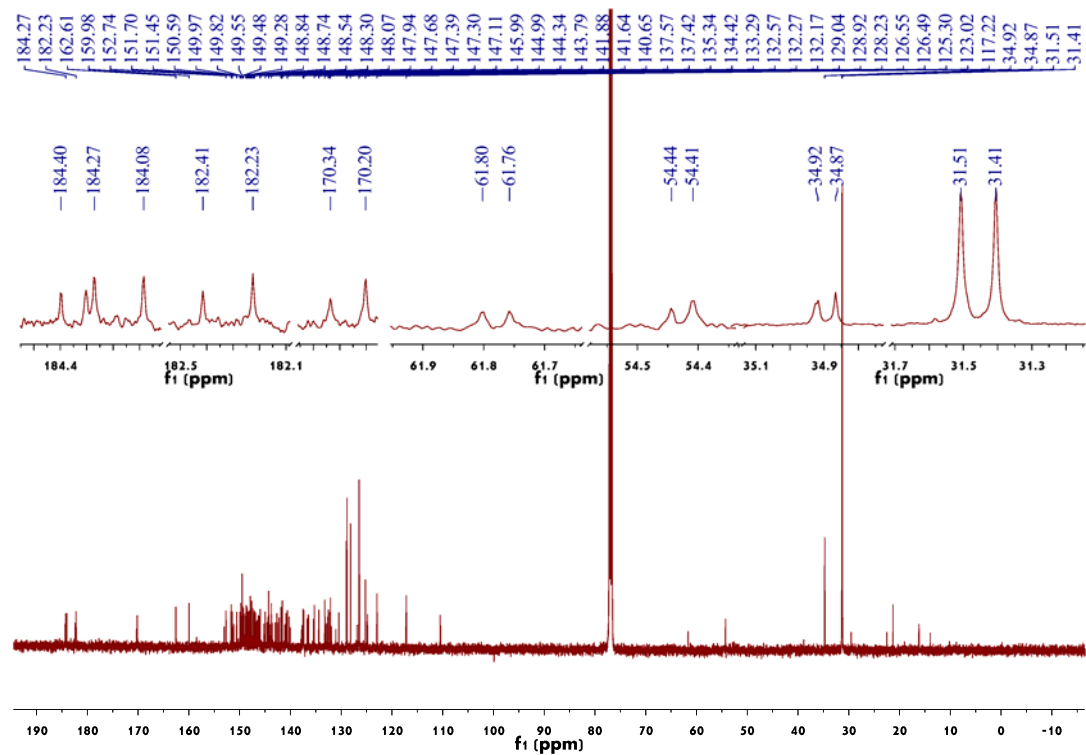

# Peking University Mass Spectrometry Sample Analysis Report

## Analysis Info

Analysis Name 13100414\_20131016\_000003.d  
Sample 2  
Comment ESI Positive

Acquisition Date 10/16/2013 3:57:18 PM  
Instrument Bruker Apex IV FTMS  
Operator Peking University

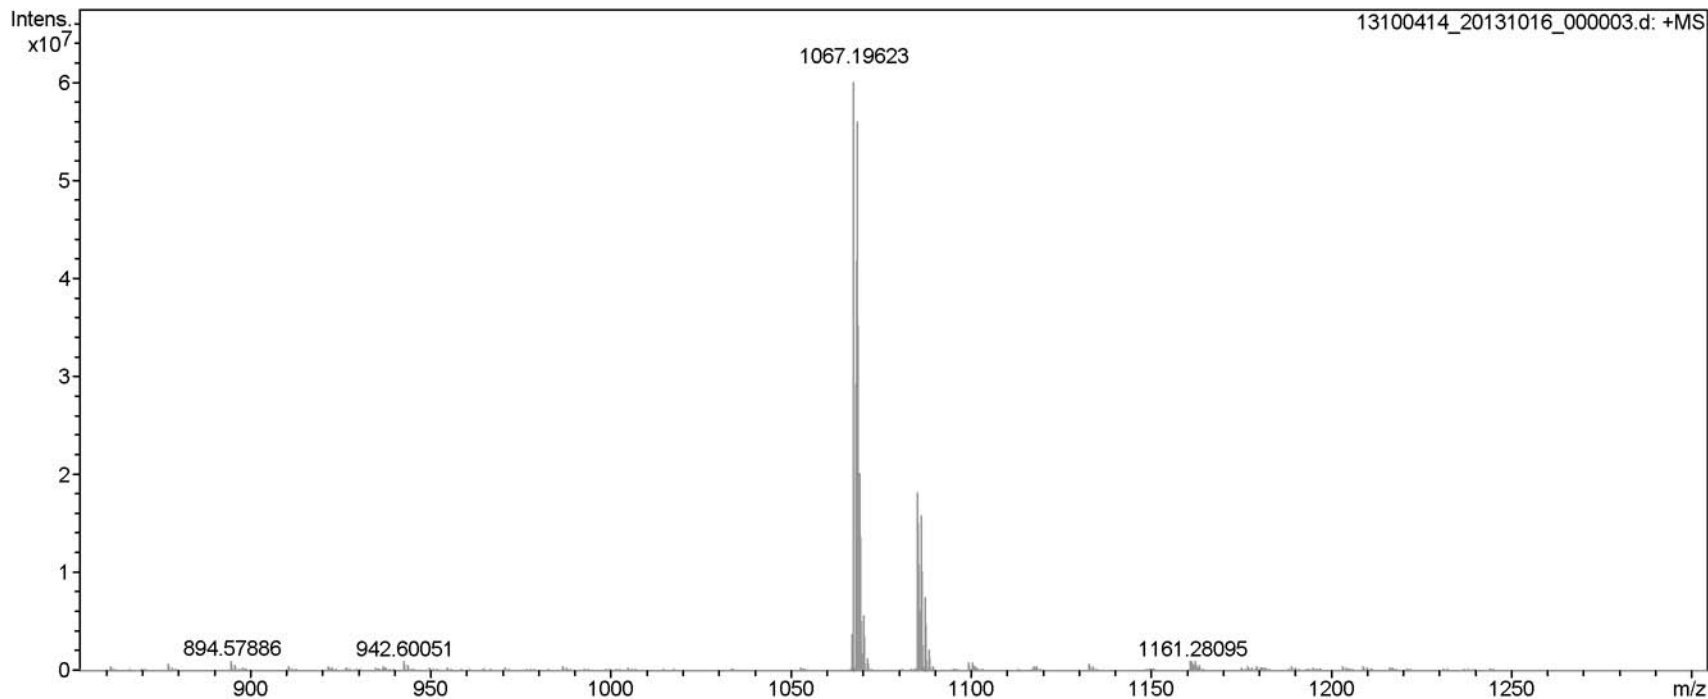

13100414\_20131016\_000003.d: +MS

| Meas. m/z  | # | Formula                                                       | Score  | m/z        | err [mDa] | err [ppm] | mSigma | rdb  | e <sup>-</sup> Conf | N-Rule |
|------------|---|---------------------------------------------------------------|--------|------------|-----------|-----------|--------|------|---------------------|--------|
| 1067.19623 | 1 | C <sub>79</sub> H <sub>27</sub> N <sub>2</sub> O <sub>4</sub> | 100.00 | 1067.19653 | 0.3       | 0.3       | 28.9   | 67.5 | even                | ok     |
